# Supplementary material for: Rapid Manufacturing of Highly Cytotoxic Clinical-Grade SARS-CoV-2-specific T Cell Products Covering SARS-CoV-2 and Its Variants for Adoptive T Cell Therapy
Source: PubMed Central journal article supplement (PMC9036989; doi:10.3389/fbioe.2022.867042), 2022-04-04
Supplement: Image1.pdf [file Image1.pdf]

## Supplementary Material

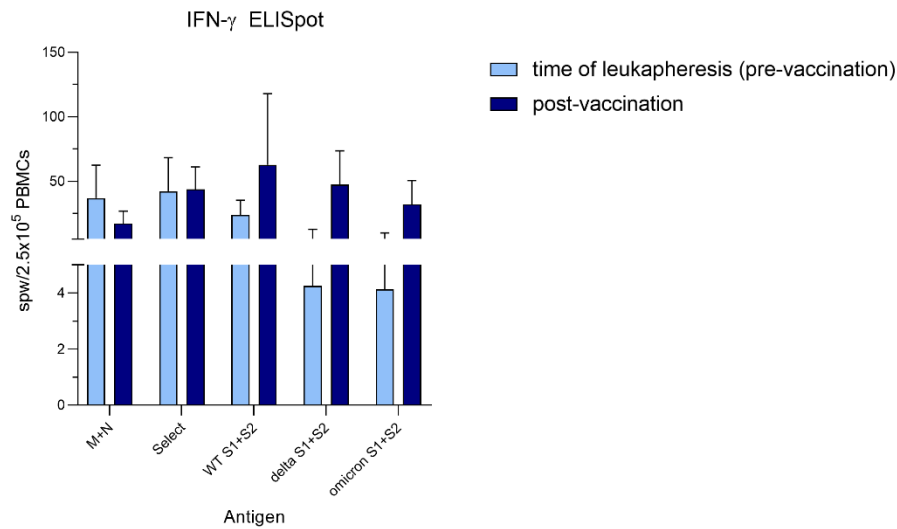

**Supplementary Figure 1. Antiviral T cells against SARS-CoV-2 wild type (WT) and variants of concern (VOC) in convalescent COVID-19 patients.** PBMCs obtained at the time of donor pre-testing (pre-vaccination) and PBMCs isolated from recently collected samples (post-vaccination) were analyzed via Interferon-gamma (IFN- $\gamma$ ) Enzyme-Linked ImmunoSpot (ELISpot) assay using peptide pools covering the Spike (S) protein from WT and different VOCs as well as membrane (M) and nucleoprotein (N). Data are shown as mean+SD. spw: spots per well.
